# Supplementary material for: FTO suppresses glycolysis and growth of papillary thyroid cancer via decreasing stability of APOE mRNA in an N6-methyladenosine-dependent manner
Source: Springer Nature journal article supplement (doi:10.1186/s13046-022-02254-z), 2022-01-28

# Figure S1

**a**

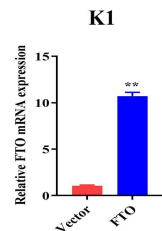

**b**

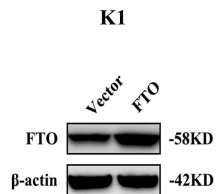

**TPC1**

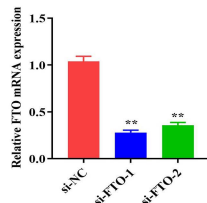

**TPC1**

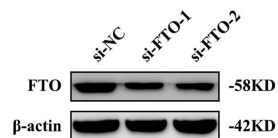

**c**

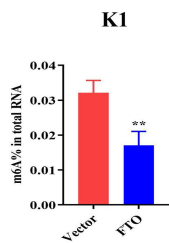

**TPC1**

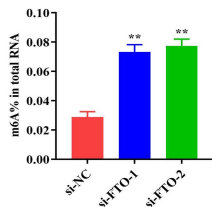

**d**

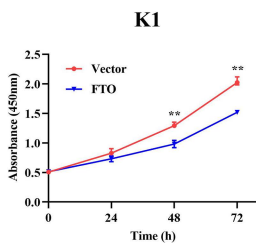

**e**

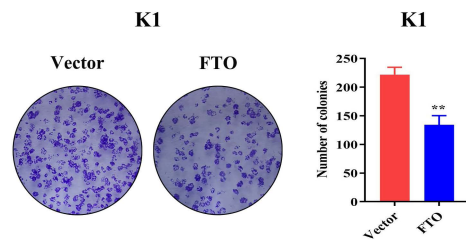

**f**

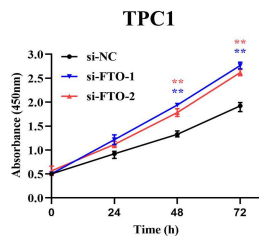

**g**

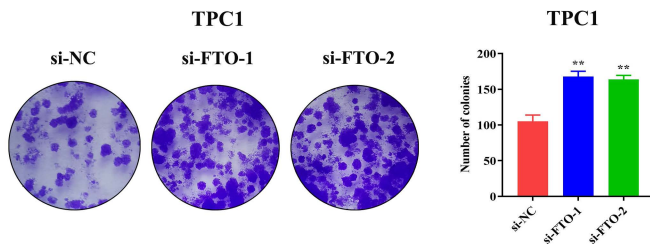

**h**

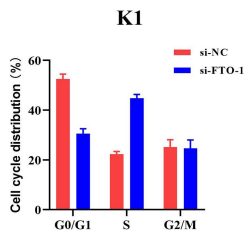

**i**

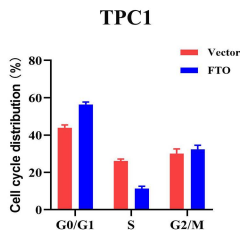

**j**

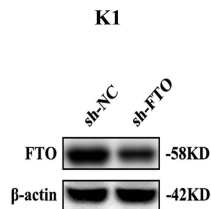

**Figure S2**

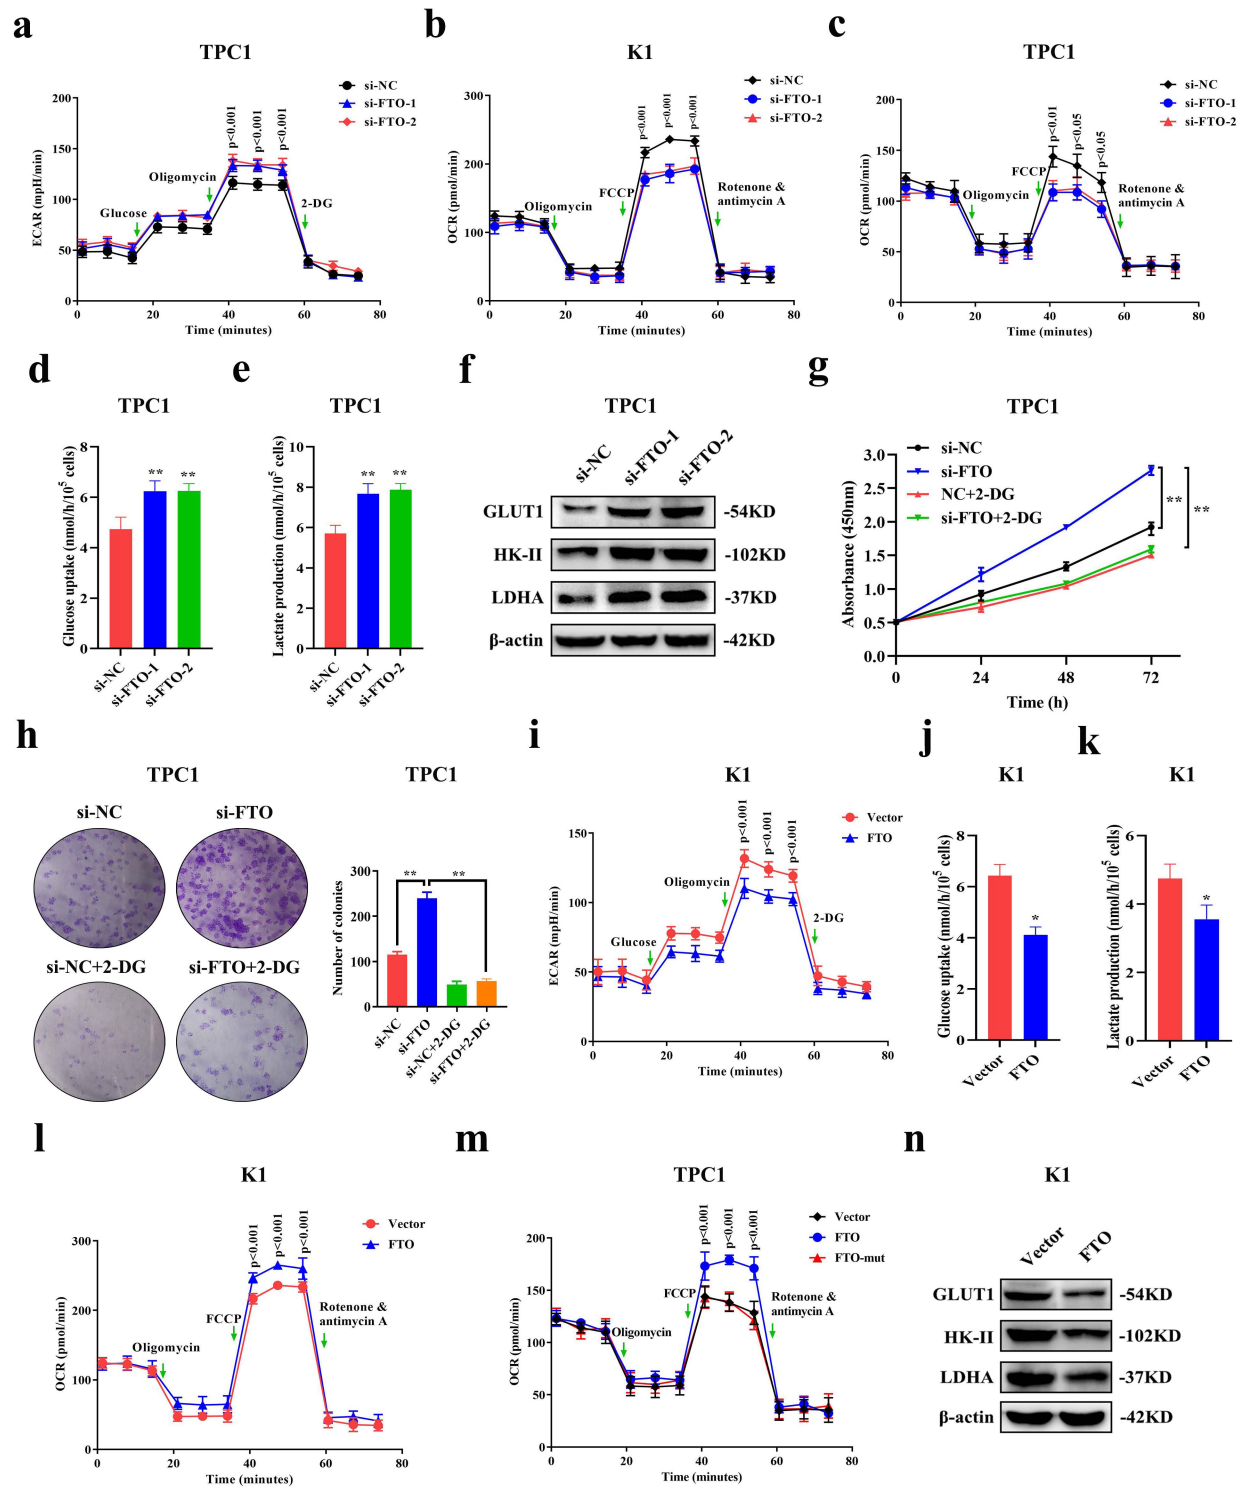

# Figure S3

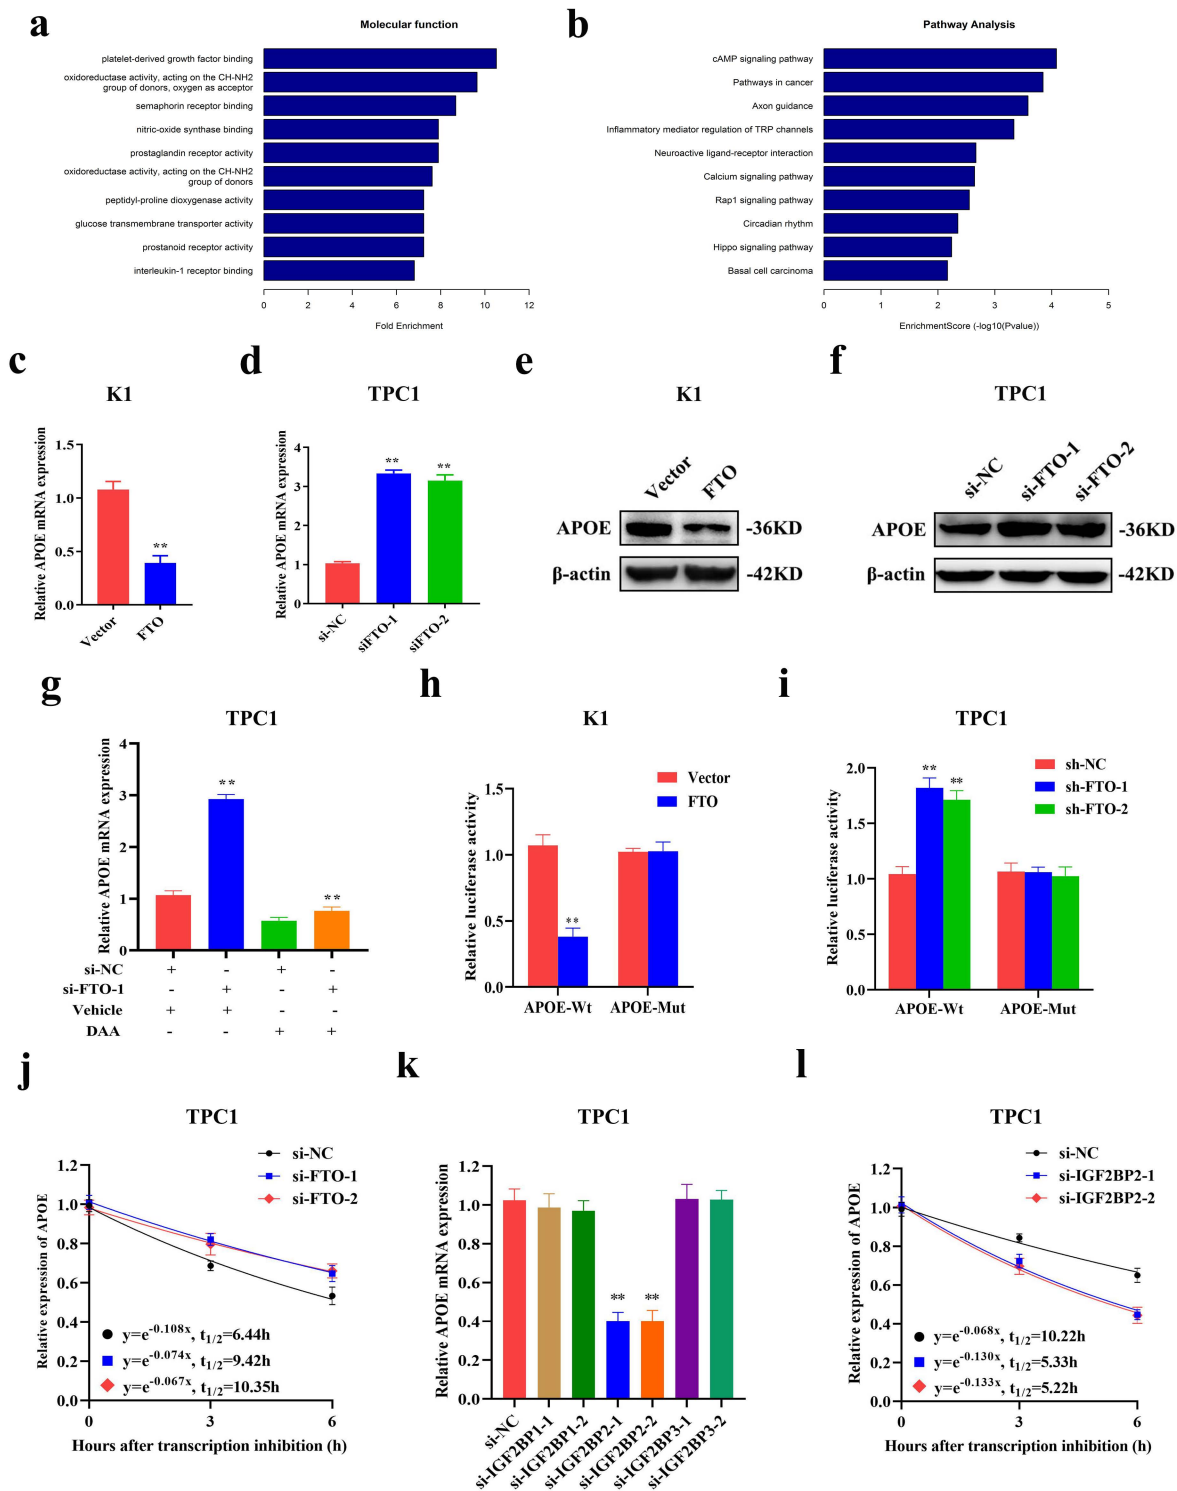

**Figure S4**

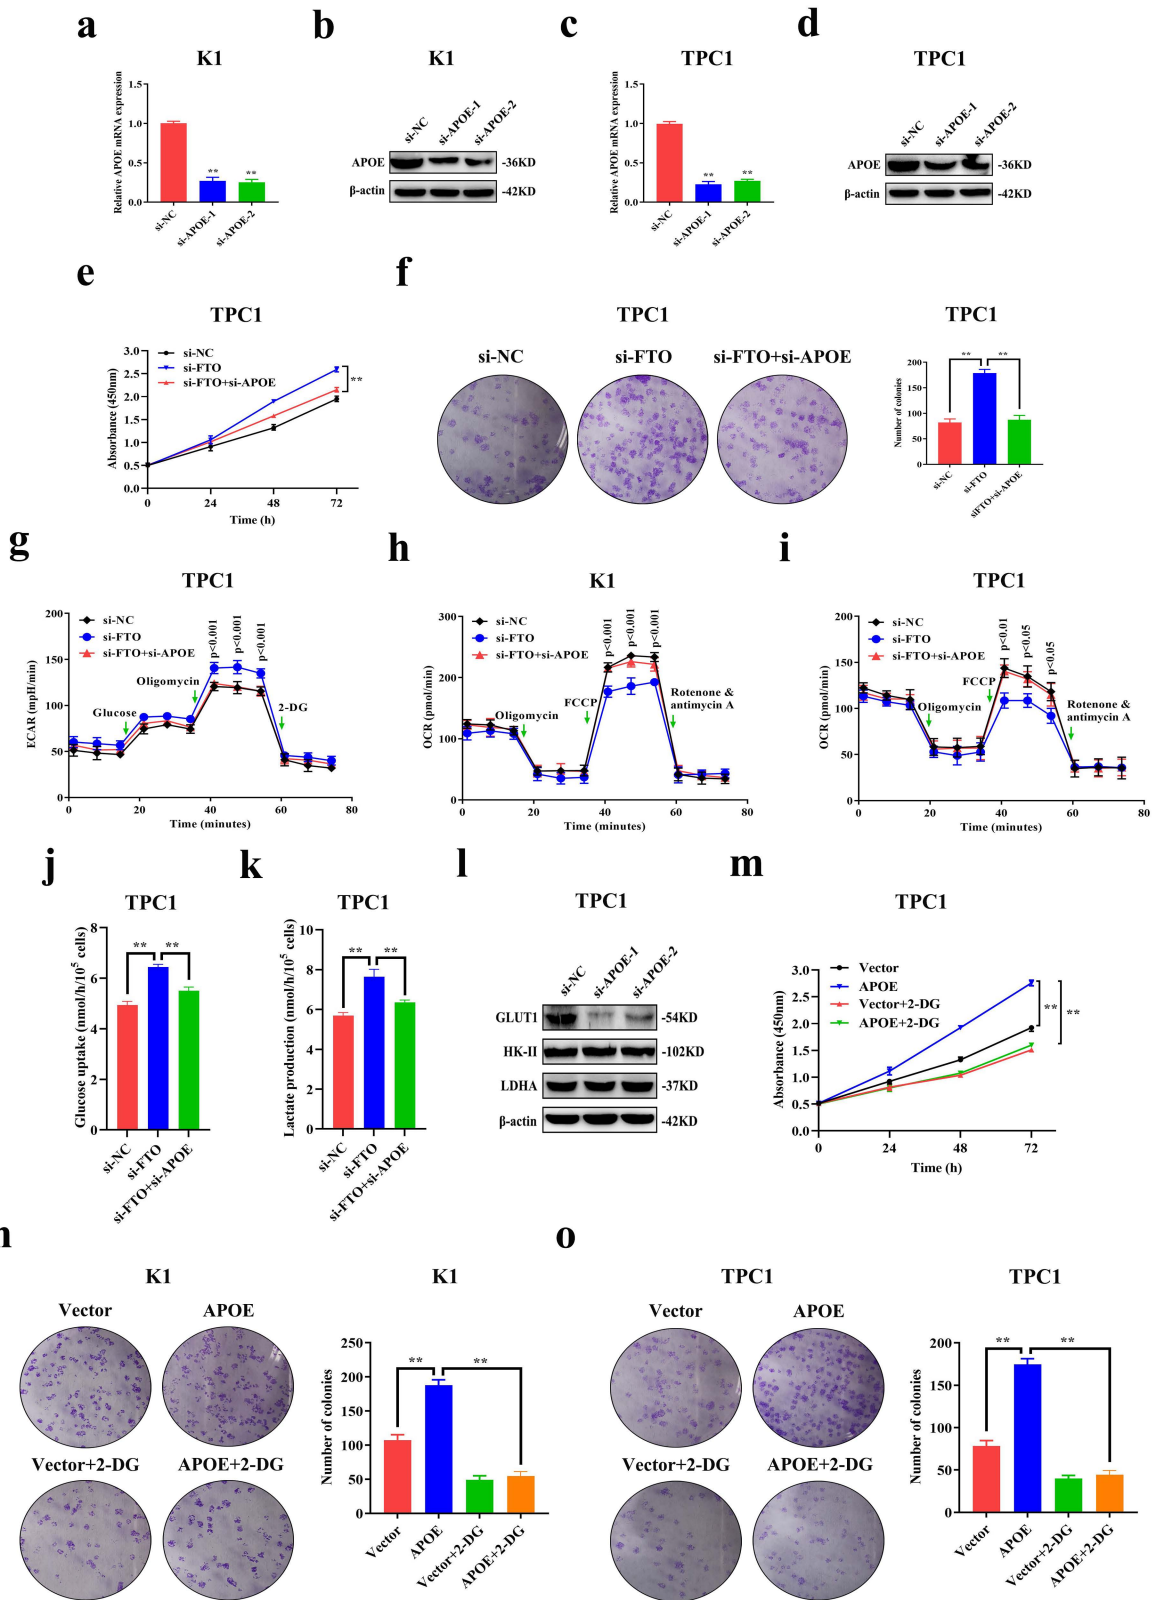

# Figure S5

**a**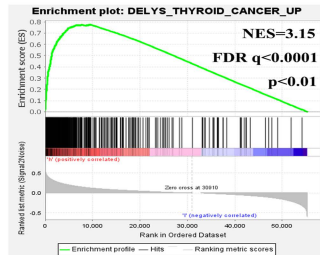**b**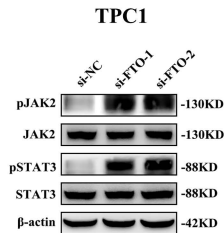**f**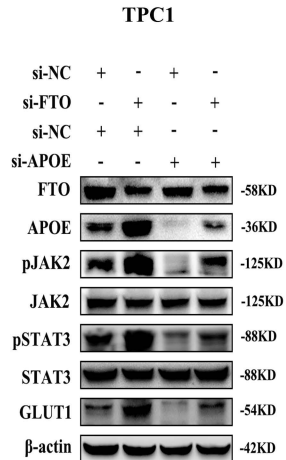**c**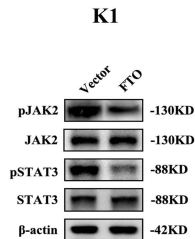**d**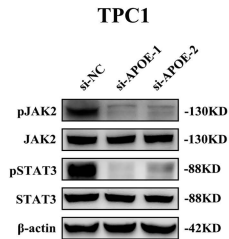**e**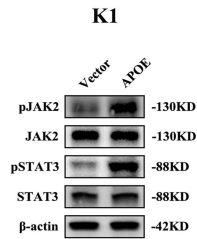

Supplement: MOESM3 [file 20076534]
